# Supplementary material
Source: Elsevier journal article supplement (https://www.sciencedirect.com/science/article/pii/S1885585717304759)
Supplement: mmc1 [file S1885585717304759:mmc1.pdf]

## Supplementary material

# Association Between Ischemic and Bleeding Risk Scores and the Use of new P2Y<sub>12</sub> Inhibitors in Patients With Acute Coronary Syndrome

## Table 1 of the supplementary material

### Univariate Logistic Regression Analyses for Predicting new P2Y<sub>12</sub> Inhibitor Prescription at Discharge

|                              | Univariate       |        |
|------------------------------|------------------|--------|
|                              | OR (95%CI)       | P      |
| Age (per 10 y)               | 0.56 (0.53-0.60) | < .001 |
| Sex, male                    | 1.84 (1.54-2.20) | < .001 |
| Medical history              |                  |        |
| Hypertension                 | 0.60 (0.51-0.69) | < .001 |
| Diabetes mellitus            | 1.07 (0.91-1.25) | .428   |
| Hyperlipidemia               | 1.20 (1.03-1.41) | .021   |
| Current smoking              | 2.47 (2.12-2.87) | < .001 |
| Low weight (< 60 kg)         | 0.60 (0.43-0.83) | .002   |
| Previous ACS                 | 0.85 (0.70-1.05) | .129   |
| Previous atrial fibrillation | 0.02 (0.01-0.07) | < .001 |
| Mechanical valve prosthesis  | -                | -      |

|                                              |                  |        |
|----------------------------------------------|------------------|--------|
| Peripheral artery disease                    | 0.48 (0.35-0.67) | < .001 |
| Previous stroke                              | 0.42 (0.29-0.62) | < .001 |
| Previous major bleeding                      | 0.34 (0.18-0.64) | .001   |
| <i>Clinical status at admission</i>          |                  |        |
| Systolic blood pressure (per 10 mmHg)        | 0.97 (0.94-0.99) | .014   |
| Heart rate (per 10 bpm)                      | 0.97 (0.93-1.01) | .145   |
| Killip class (per I class)                   | 0.79 (0.69-0.90) | .001   |
| Cardiac arrest at admission                  | 1.51 (0.93-4.46) | .094   |
| <i>Complementary test results</i>            |                  |        |
| Hematocrit (per 3%)                          | 1.29 (1.23-1.36) | < .001 |
| eGFR (per 10 mL/min/1.73 m <sup>2</sup> )    | 1.26 (1.22-1.31) | < .001 |
| Elevated cardiac markers                     | 2.39 (1.86-3.08) | < .001 |
| ST-segment deviation                         | 1.61 (1.38-1.88) | < .001 |
| LVEF ≤ 50%                                   | 0.88 (0.75-1.03) | .107   |
| <i>In-hospital procedures and treatments</i> |                  |        |
| LM and/or 3-vessel disease                   | 0.62 (0.52-0.75) | < .001 |
| Percutaneous coronary intervention           | 6.51 (5.08-8.34) | < .001 |
| Coronary artery bypass grafting              | 0.07 (0.03-0.17) | < .001 |
| Thrombolysis                                 | 2.16 (1.28-3.63) | .004   |
| Conservative management                      | 0.20 (0.15-0.26) | < .001 |
| <i>In-hospital events</i>                    |                  |        |
| Stent thrombosis                             | 5.54 (1.70-18.0) | .004   |

|                                                 |                  |        |
|-------------------------------------------------|------------------|--------|
| Atrial fibrillation                             | 0.32 (0.21-0.47) | < .001 |
| Left ventricular thrombus                       | 0.05 (0.01-0.39) | .004   |
| Stroke                                          | 0.65 (0.22-1.96) | .445   |
| Major bleeding                                  | 0.31 (0.15-0.64) | .002   |
| <i>Final diagnosis</i>                          |                  |        |
| STEACS                                          | 2.32 (2.00-2.69) | < .001 |
| NSTEACS                                         | 0.56 (0.48-0.65) | < .001 |
| Undetermined ACS                                | 0.28 (0.19-0.42) | < .001 |
| <i>Risk scores</i>                              |                  |        |
| GRACE 6-mo mortality risk score (per 10 points) | 0.87 (0.85-0.89) | < .001 |
| CRUSADE bleeding risk score (per 10 points)     | 0.90 (0.88-0.91) | < .001 |
| <i>Other</i>                                    |                  |        |
| Indication for OAT at discharge*                | 0.13 (0.10-0.19) | < .001 |
| Stroke (previous and in-hospital)               | 0.45 (0.31-0.64) | < .001 |
| Major bleeding (previous and in-hospital)       | 0.33 (0.20-0.53) | < .001 |

**95%CI, 95% confidence interval; ACS, acute coronary syndrome; eGFR, estimated glomerular filtration rate using CKD-EPI equation; LM, left main artery; LVEF, left ventricular ejection function; NSTEMACS, non-ST-segment elevation acute coronary syndrome; OAT, oral anticoagulation therapy; OR, odds ratio; STEACS, ST-segment elevation acute coronary syndrome.**

**\*Indications for OAT at discharge including atrial fibrillation (previous or in-hospital), mechanical valve prosthesis, left ventricular thrombus, and other conditions.**

**Table 2A of the supplementary material**

**Multivariate Logistic Regression Analysis Evaluating GRACE Risk Score Influence on new P2Y<sub>12</sub> Inhibitor Prescription at Discharge**

|                                         | Multivariate     |        |
|-----------------------------------------|------------------|--------|
|                                         | OR (95%CI)       | P      |
| <i>Both P2Y<sub>12</sub> inhibitors</i> |                  |        |
| GRACE risk score (per 10 points)        | 0.89 (0.86-0.92) | < .001 |
| Diabetes                                | 1.59 (1.31-1.92) | < .001 |
| Hyperlipidemia                          | 1.34 (1.12-1.61) | .002   |
| Current smoking                         | 1.46 (1.22-1.75) | < .001 |
| Peripheral artery disease               | 0.61 (0.42-0.88) | .008   |
| Hematocrit (per 3%)                     | 1.05 (1.03-1.07) | < .001 |
| Percutaneous coronary intervention      | 5,01 (3.82-6.56) | < .001 |
| Coronary artery bypass grafting         | 0.24 (0.09-0.59) | .002   |
| STEACS                                  | 1.34 (1.16-1.56) | < .001 |
| In-hospital stent thrombosis            | 5.58 (1.44-21.7) | .013   |

|                                    |                  |        |
|------------------------------------|------------------|--------|
| Indication for OAT at discharge    | 0.18 (0.13-0.26) | < .001 |
| <i>Prasugrel</i>                   |                  |        |
| GRACE risk score (per 10 points)   | 0.86 (0.82-0.90) | < .001 |
| Diabetes                           | 4.60 (3.48-6.07) | < .001 |
| Current smoking                    | 1.53 (1.16-2.02) | .002   |
| Hematocrit (per 3%)                | 1.54 (1.14-1.37) | < .001 |
| Low weight (< 60 kg)               | 0.40 (0.18-0.92) | .032   |
| Percutaneous coronary intervention | 18.3 (9.24-36.1) | < .001 |
| STEACS                             | 1.96 (1.56-2.46) | < .001 |
| In-hospital stent thrombosis       | 20.4 (4.78-87.4) | < .001 |
| Indication for OAT at discharge    | 0.19 (0.10-0.34) | < .001 |
| Stroke (previous and in-hospital)  | 0.26 (0.10-0.65) | .004   |
| <i>Ticagrelor</i>                  |                  |        |
| GRACE risk score (per 10 points)   | 0.91 (0.88-0.94) | < .001 |
| Hyperlipidemia                     | 1.34 (1.10-1.64) | .004   |
| Current smoking                    | 1.48 (1.21-1.81) | < .001 |
| Hematocrit (per 3%)                | 1.13 (1.06-1.21) | < .001 |
| Peripheral artery disease          | 0.53 (0.34-0.83) | .005   |
| Percutaneous coronary intervention | 3.85 (2.90-5.11) | < .001 |
| Coronary artery bypass grafting    | 0.17 (0.06-0.46) | .001   |
| Indication for OAT at discharge    | 0.17 (0.11-0.27) | < .001 |

95%CI, 95% confidence interval; ACS, acute coronary syndrome; LM, left main artery; LVEF, left ventricular ejection function; OAT, oral anticoagulation therapy; OR, odds ratio; STEACS, ST-segment elevation acute coronary syndrome.

The multivariate models included GRACE risk score, sex, hypertension, diabetes, hyperlipidemia, current smoking, low weight < 60 kg, previous ACS, peripheral artery disease, hematocrit, LVEF  $\leq$  50%, LM and/or 3-vessel disease, percutaneous coronary intervention, coronary artery bypass grafting, conservative management, in-hospital stent thrombosis, final ACS diagnosis, indications for OAT at discharge (atrial fibrillation [previous or in-hospital], mechanical valve prosthesis, left ventricular thrombus and other), stroke (previous and in-hospital), and major bleeding (previous and in-hospital).

**Table 2B of the supplementary material.****Multivariate Logistic Regression Analysis Evaluating CRUSADE Risk Score Influence on new P2Y<sub>12</sub> Inhibitor Prescription at Discharge**

|                                           | Multivariate     |        |
|-------------------------------------------|------------------|--------|
|                                           | OR (95%CI)       | P      |
| <i>Both P2Y<sub>12</sub> inhibitors</i>   |                  |        |
| CRUSADE risk score (per 10 points)        | 0.96 (0.94-0.98) | < .001 |
| Age (per 10 y)                            | 0.62 (0.57-0.68) | < .001 |
| Hyperlipidemia                            | 1.42 (1.18-1.71) | < .001 |
| Elevated cardiac markers                  | 1.66 (1.23-2.23) | .001   |
| ST-segment deviation                      | 1.29 (1.07-1.56) | .009   |
| Percutaneous coronary intervention        | 4.80 (3.65-6.32) | < .001 |
| Coronary artery bypass grafting           | 0.23 (0.09-0.58) | .002   |
| In-hospital stent thrombosis              | 5.42 (1.45-20.3) | .012   |
| Major bleeding (previous and in-hospital) | 0.53 (0.31-0.89) | .018   |
| Indication for OAT at discharge           | 0.19 (0.13-0.27) | < .001 |
| <i>Prasugrel</i>                          |                  |        |
| CRUSADE risk score (per 10 points)        | 0.95 (0.92-0.99) | .009   |
| Age (per 10 y)                            | 0.54 (0.47-0.62) | < .001 |
| Diabetes                                  | 5.44 (3.98-7.42) | < .001 |

|                                    |                  |        |
|------------------------------------|------------------|--------|
| Hyperlipidemia                     | 1.38 (1.03-1.85) | .033   |
| Elevated cardiac markers           | 1.85 (1.06-3.23) | .031   |
| ST-segment deviation               | 2.22 (1.61-3.08) | < .001 |
| Percutaneous coronary intervention | 16.8 (8.50-33.3) | < .001 |
| In-hospital stent thrombosis       | 13.8 (2.54-74.9) | .002   |
| Stroke (previous and in-hospital)  | 2.26 (0.10-0.66) | .005   |
| Indication for OAT at discharge    | 0.20 (0.11-0.37) | < .001 |
| <i>Ticagrelor</i>                  |                  |        |
| CRUSADE risk score (per 10 points) | 0.96 (0.94-0.99) | .003   |
| Age (per 10 y)                     | 0.67 (0.61-0.74) | < .001 |
| Hyperlipidemia                     | 1.48 (1.20-1.81) | < .001 |
| Elevated cardiac markers           | 1.67 (1.23-2.83) | .001   |
| Percutaneous coronary intervention | 3.68 (2.77-4.90) | < .001 |
| Coronary artery bypass grafting    | 0.17 (0.06-0.46) | .001   |
| Indication for OAT at discharge    | 0.18 (0.11-0.28) | < .001 |

**95%CI, 95% confidence interval; ACS, acute coronary syndrome; LM, left main artery; LVEF, left ventricular ejection function; OAT, oral anticoagulation therapy; OR, odds ratio; STEACS, ST-segment elevation acute coronary syndrome.**

**The multivariate model included CRUSADE risk score, age, hypertension, diabetes, hyperlipidemia, current smoking, low weight < 60 kg, previous**

ACS, cardiac arrest at admission, elevated cardiac markers, ST-segment deviation, LVEF  $\leq 50\%$ , LM and/or 3-vessel disease, percutaneous coronary intervention, coronary artery bypass grafting, conservative management, in-hospital stent thrombosis, final ACS diagnosis, indications for OAT at discharge (atrial fibrillation [previous or in-hospital], mechanical valve prosthesis, left ventricular thrombus and other), stroke (previous and in-hospital) and major bleeding (previous and in-hospital).
